# Supplementary material
Source: HighWire-hosted journal article supplement (https://cmaj.ca/content/suppl/2012/04/23/cmaj.111758)
Supplement: opioids-rocker-2-at.pdf [file opioids-rocker-2-at.pdf]

Appendix 2

Pt STATUS AND DEMOGRAPHICS Form

Study PID Number: \_\_\_ -- \_\_\_

Post-Opioid Experience Study ..... Site # Sequence#

|                                                                                    |
|------------------------------------------------------------------------------------|
| Patient Initials: _____ -- _____ -- _____<br>First           Middle           Last |
| Date of Birth: _____ -- _____ -- _____<br>Year           Month           Day       |
| Gender (circle one):    F    or    M                                               |

|                            |                              |            |
|----------------------------|------------------------------|------------|
| Marital status of Patient: |                              | (√)<br>one |
| 1                          | Married or living as married |            |
| 2                          | Widowed                      |            |
| 3                          | Never married                |            |
| 4                          | Divorced or separated        |            |
| 5                          | Other (specify):             |            |

|                                                                                |
|--------------------------------------------------------------------------------|
| Oxygen therapy: No _____ Yes _____ Flowrate _____ Saturation _____% FEV1 _____ |
|--------------------------------------------------------------------------------|

|                                      |                               |            |
|--------------------------------------|-------------------------------|------------|
| Ethnic/ Racial Group – self assessed |                               | (√)<br>one |
| 1                                    | Asian/ Pacific Islander       |            |
| 2                                    | African/ Black North American |            |
| 3                                    | Caucasian                     |            |
| 4                                    | East Indian                   |            |
| 5                                    | Native Canadian               |            |
| 6                                    | Other (specify):              |            |

|                                     |                                               |            |
|-------------------------------------|-----------------------------------------------|------------|
| Education -- highest level achieved |                                               | (√)<br>one |
| 1                                   | Elementary school or less                     |            |
| 2                                   | Some high school                              |            |
| 3                                   | High school graduate                          |            |
| 4                                   | Some college (including CEGEP)/ trade school  |            |
| 5                                   | College diploma (including DEC)/ trade school |            |
| 6                                   | Attended university                           |            |
| 7                                   | University degree                             |            |
| 8                                   | Post graduate degree                          |            |
| 9                                   | Other (specify):                              |            |

|                                  |                    |            |                                                                                                                                                  |                    |            |
|----------------------------------|--------------------|------------|--------------------------------------------------------------------------------------------------------------------------------------------------|--------------------|------------|
| Employment Status                |                    |            | Has your employment status changed as a result of your illness?<br><input type="checkbox"/> No or <input type="checkbox"/> Yes – complete below: |                    |            |
| <u>Current</u> Employment Status |                    | (√)<br>one | If YES: What was your <u>previous</u> employment status?                                                                                         |                    | (√)<br>one |
| 1                                | Employed full time |            | 1                                                                                                                                                | Employed full time |            |
| 2                                | Employed part time |            | 2                                                                                                                                                | Employed part time |            |
| 3                                | On paid leave      |            | 3                                                                                                                                                | On paid leave      |            |
| 4                                | On unpaid leave    |            | 4                                                                                                                                                | On unpaid leave    |            |
| 5                                | Self-employed      |            | 5                                                                                                                                                | Self-employed      |            |
| 6                                | Retired            |            | 6                                                                                                                                                | Retired            |            |
| 7                                | Not employed       |            | 7                                                                                                                                                | Not employed       |            |
| 8                                | Other (specify):   |            | 8                                                                                                                                                | Other (specify):   |            |

## Appendix 2

| 0  |                                              | Comorbid Illnesses – circle all number codes that apply |                                                                   |    |                                                                             |
|----|----------------------------------------------|---------------------------------------------------------|-------------------------------------------------------------------|----|-----------------------------------------------------------------------------|
|    | Myocardial                                   |                                                         |                                                                   |    | Cancer/ Immune                                                              |
| 1  | Angina                                       |                                                         | Endocrine                                                         | 25 | Any tumour                                                                  |
| 2  | Arrhythmia                                   | 15                                                      | Diabetes Type 1 or II                                             | 26 | Lymphoma                                                                    |
| 3  | Valvular disease                             | 16                                                      | Diabetes with end organ damage                                    | 27 | Leukemia                                                                    |
| 4  | Myocardial infarction                        |                                                         |                                                                   | 28 | AIDS                                                                        |
| 5  | CHF or heart disease                         | 17                                                      | Obesity and/ or BMI >30 (weight in kg/ ht in metres) <sup>2</sup> | 29 | Metastatic solid tumour                                                     |
|    | Vascular                                     |                                                         |                                                                   |    | Psychological                                                               |
| 6  | Hypertension                                 |                                                         | Renal                                                             | 30 | Anxiety or panic disorder                                                   |
| 7  | Peripheral vascular disease or claudication  | 18                                                      | Moderate or severe renal disease                                  | 31 | Depression                                                                  |
| 8  | Cerebrovascular disease                      |                                                         | Gastrointestinal                                                  |    | Muskoskeletal                                                               |
|    | Pulmonary                                    | 19                                                      | Mild liver disease                                                | 32 | Arthritis (rheumatoid or osteo-)                                            |
| 9  | COPD, emphysema                              |                                                         |                                                                   | 33 | Denegerative disc disease (back, spinal stenosis, severe chronic back pain) |
| 10 | Asthma                                       | 20                                                      | Moderate/ severe liver disease                                    | 34 | Osteoporosis                                                                |
|    | Neurologic                                   |                                                         |                                                                   | 35 | Connective tissue disease                                                   |
| 11 | Dementia                                     | 21                                                      | GI bleeding                                                       |    | Miscellaneous                                                               |
| 12 | Hemiplegia (paraplegia)                      | 22                                                      | Inflammatory bowel disease                                        | 36 | Visual impairment (cataracts, glaucoma, macular degeneration)               |
| 13 | Stroke or TIA                                | 23                                                      | Peptic ulcer disease                                              | 37 | Hearing impairment (very hard of hearing even with hearing aid)             |
| 14 | Neurologic illnesses (e.g. MS or Parkinsons) | 24                                                      | GI disease (hernia, reflux)                                       |    |                                                                             |

| Palliative Performance Scale (PPS) – Please circle the applicable % level in the far left column |                   |                                                         |                                     |                   |                             |
|--------------------------------------------------------------------------------------------------|-------------------|---------------------------------------------------------|-------------------------------------|-------------------|-----------------------------|
| %                                                                                                | Ambulation        | Activity and Evidence of Disease                        | Self Care                           | Intake            | Consciousness Level         |
| 100                                                                                              | Full              | Normal Activity<br>No Evidence of Disease               | Full                                | Normal            | Full                        |
| 90                                                                                               | Full              | Normal Activity Some<br>Evidence of Disease             | Full                                | Normal            | Full                        |
| 80                                                                                               | Full              | Normal Activity with Effort<br>Some Evidence of Disease | Full                                | Normal or Reduced | Full                        |
| 70                                                                                               | Reduced           | Unable Normal Job/Work<br>Some Evidence of Disease      | Full                                | Normal or Reduced | Full                        |
| 60                                                                                               | Reduced           | Unable Hobby/House Work<br>Significant Disease          | Occasional Assistance<br>Necessary  | Normal or Reduced | Full or Confusion           |
| 50                                                                                               | Mainly Sit/Lie    | Unable to Do Any Work<br>Extensive Disease              | Considerable<br>Assistance Required | Normal or Reduced | Full or Confusion           |
| 40                                                                                               | Mainly in Bed     | As Above                                                | Mainly Assistance                   | Normal or Reduced | Full or Drowsy or Confusion |
| 30                                                                                               | Totally Bed Bound | As Above                                                | Total Care                          | Reduced           | Full or Drowsy or Confusion |

Appendix to: Rocker G, Young J, Donahue M, et al. Perspectives of patients, family caregivers and physicians about the use of opioids for refractory dyspnea in advanced chronic obstructive pulmonary disease. *CMAJ* 2012.

DOI:10.1503/cmaj.111758

Copyright © 2012 Canadian Medical Association or its licensors.

## Appendix 2

|    |          |          |            |                 |                             |
|----|----------|----------|------------|-----------------|-----------------------------|
| 20 | As above | As Above | Total Care | Minimal Sips    | Full or Drowsy or Confusion |
| 10 | As above | As Above | Total Care | Mouth Care Only | Drowsy or Coma              |
| 0  | Death    | -        | -          | -               | -                           |

*Please continue on page 2 ----->*

Appendix 2

**Opioid details:**

How long has the patient been taking opioids? \_\_\_\_\_  
Compliance (patient self-reported)? \_\_\_\_\_  
Opioid type (long vs. short-acting) and drug name: \_\_\_\_\_  
Current dose: \_\_\_\_\_

**Questions about living arrangements:**

- a) Tell us about the community in which you live?  
 Mostly Rural     Mostly Urban     Mixed
- b) Does your home have more than one level, i.e., flights of stairs?  
 No     Yes - if yes, how many? \_\_\_\_\_
- c) Are you able to drive yourself to medical appointments?  
 Yes     No longer drive, rely on \_\_\_\_\_     No vehicle
- d) Do you have children?  
 No     Yes - number of children \_\_\_\_\_
- e) Would you say you are a follower of a particular religious tradition? e.g., Christianity, Judaism, Islam, etc.  
 No     Yes \_\_\_\_\_ If Christian, denomination \_\_\_\_\_
- f) How important are these beliefs to you at this point in your life?  
 Unimportant     Somewhat unimportant     neither important nor unimportant     Somewhat important     Important
- g) Do you have an advance directive (living will or power of attorney for health care decisions)?  
 No     Don't know     Yes: advance directive \_\_\_\_; power of attorney \_\_\_\_
- h) If you were given the choice, where would you prefer to die (for example: at home, in hospital, elsewhere)?  
 Don't know     at home     in hospital     elsewhere (please specify) \_\_\_\_\_

**For coordinator/interviewer:**

Qualitative interview completed: No \_\_\_\_\_ Yes \_\_\_\_\_ date: \_\_\_\_\_

Completed scales/questionnaires:

VAS.....                       Summary questions.....   
QoL.....                       HADS.....

Appendix 2

CRQ.....

NOSE.....

*Sign and date this form*

Name of Site Research Coordinator/Interviewer: \_\_\_\_\_

Signature: \_\_\_\_\_ Date Completed: \_\_\_\_\_

*Definition of CAREGIVER* in this study: anyone (related or not) who provides care for someone who is seriously ill and is not paid to do so.

*What we mean by CARE:* anything done for the person because he or she has a serious illness.

*Some examples are:* household chores you took over; household chores that now take more time (for example, extra laundry or preparing special foods); outside chores (yard work, snow removal, running errands, shopping) that you took over or now take more time; banking and paperwork that are new, you took over, or now take more time; direct care for the care recipient (bathing, feeding, skin care, giving medications, wound care, toileting, transferring between bed and chair; additional time you spend with the care recipient, including keeping him or her company and being present for safety reasons; arranging appointments, arranging for help from paid or unpaid others; attending health care appointments; transportation; time spent in the hospital. *Please note that this is just a partial list.*

|                                                                                                                                                                                         |
|-----------------------------------------------------------------------------------------------------------------------------------------------------------------------------------------|
| Caregiver Initials: _____ -- _____ -- _____<br><div style="display: flex; justify-content: space-around; width: 100%;"> <span>First</span> <span>Middle</span> <span>Last</span> </div> |
| Date of Birth: _____ -- _____ -- _____<br><div style="display: flex; justify-content: space-around; width: 100%;"> <span>Year</span> <span>Month</span> <span>Day</span> </div>         |
| Gender (circle one):    F    or    M                                                                                                                                                    |

|                              |                                      |            |
|------------------------------|--------------------------------------|------------|
| Marital status of Caregiver: |                                      | (√)<br>one |
| 1                            | Married or living as married         |            |
| 2                            | Widowed                              |            |
| 3                            | Never married                        |            |
| 4                            | Divorced or separated; not remarried |            |
| 5                            | Other (specify):                     |            |

|                                                                |                        |            |
|----------------------------------------------------------------|------------------------|------------|
| Relationship to care recipient.<br>You are caring for your ... |                        | (√)<br>one |
| 1                                                              | Husband/ wife/ partner |            |
| 2                                                              | Parent                 |            |
| 3                                                              | Parent-in-law          |            |
| 4                                                              | Daughter/ son          |            |
| 5                                                              | Sister/ brother        |            |
| 6                                                              | Other (specify):       |            |

|                                                                                                          |                      |    |
|----------------------------------------------------------------------------------------------------------|----------------------|----|
| Do you presently live with the care recipient?                                                           |                      |    |
| <input type="checkbox"/>                                                                                 | No                   | or |
| <input type="checkbox"/>                                                                                 | Yes – complete below |    |
| If Yes:<br>For <u>how long</u> have you lived with<br>the care recipient?<br>_____ months or _____ years |                      |    |

|                                                                                                                        |
|------------------------------------------------------------------------------------------------------------------------|
| For <u>how long</u><br>have you been<br>a caregiver<br>for the<br>care recipient?<br>_____ months<br>or<br>_____ years |
|------------------------------------------------------------------------------------------------------------------------|

|                                                                                                                                            |
|--------------------------------------------------------------------------------------------------------------------------------------------|
| In the past month, how many hours <i>on average</i> have you spent caregiving for the care recipient?<br>_____ hours per week<br>Comments: |
|--------------------------------------------------------------------------------------------------------------------------------------------|

|                                                                                                              |                                                                    |       |                |
|--------------------------------------------------------------------------------------------------------------|--------------------------------------------------------------------|-------|----------------|
| Are there other family members, friends, or neighbours involved in unpaid caregiving for the care recipient? |                                                                    |       |                |
| <input type="checkbox"/>                                                                                     | No – none                                                          |       |                |
| or                                                                                                           |                                                                    |       |                |
| <input type="checkbox"/>                                                                                     | Yes – specify <u>how many</u> and <u>number of hours</u> per week: |       |                |
| _____                                                                                                        | family members                                                     | _____ | hours per week |
| _____                                                                                                        | friends                                                            | _____ | hours per week |
| _____                                                                                                        | neighbours                                                         | _____ | hours per week |

*Please continue on page 2 ----->*

Appendix 2

| Ethnic/ Racial Group – self assessed |                               | (√)<br>one |
|--------------------------------------|-------------------------------|------------|
| 1                                    | Asian/ Pacific Islander       |            |
| 2                                    | African/ Black North American |            |
| 3                                    | Caucasian                     |            |
| 4                                    | East Indian                   |            |
| 5                                    | Native Canadian               |            |
| 6                                    | Other (specify):              |            |

| Education -- highest level achieved |                                               | (√)<br>one |
|-------------------------------------|-----------------------------------------------|------------|
| 1                                   | Elementary school or less                     |            |
| 2                                   | Some high school                              |            |
| 3                                   | High school graduate                          |            |
| 4                                   | Some college (including CEGEP)/ trade school  |            |
| 5                                   | College diploma (including DEC)/ trade school |            |
| 6                                   | Attended university                           |            |
| 7                                   | University degree                             |            |
| 8                                   | Post graduate degree                          |            |
| 9                                   | Other (specify):                              |            |

|                                                                                    |                    |                                                                                                                                                       |                    |
|------------------------------------------------------------------------------------|--------------------|-------------------------------------------------------------------------------------------------------------------------------------------------------|--------------------|
| Employment Status                                                                  |                    | Has your employment status changed as a result of your caregiving role? <input type="checkbox"/> No or <input type="checkbox"/> Yes – complete below: |                    |
| <u>Current</u> Employment Status                                                   |                    | If YES: What was your <u>previous</u> employment status?                                                                                              |                    |
|                                                                                    | (√)<br>one         |                                                                                                                                                       | (√)<br>one         |
| 1                                                                                  | Employed full time | 1                                                                                                                                                     | Employed full time |
| 2                                                                                  | Employed part time | 2                                                                                                                                                     | Employed part time |
| 3                                                                                  | On paid leave      | 3                                                                                                                                                     | On paid leave      |
| 4                                                                                  | On unpaid leave    | 4                                                                                                                                                     | On unpaid leave    |
| 5                                                                                  | Self-employed      | 5                                                                                                                                                     | Self-employed      |
| 6                                                                                  | Retired            | 6                                                                                                                                                     | Retired            |
| 7                                                                                  | Not employed       | 7                                                                                                                                                     | Not employed       |
| 8                                                                                  | Other (specify):   | 8                                                                                                                                                     | Other (specify):   |
| Does your <u>current</u> employment status allow you to take time to provide care? |                    |                                                                                                                                                       |                    |
|                                                                                    |                    |                                                                                                                                                       | (√)<br>one         |
| 1                                                                                  | Yes, completely    |                                                                                                                                                       |                    |
| 2                                                                                  | Yes, partially     |                                                                                                                                                       |                    |
| 3                                                                                  | No, not at all     |                                                                                                                                                       |                    |
| Comments:                                                                          |                    |                                                                                                                                                       |                    |

**Questions for Caregiver:**

Would you say you are a follower of any particular religious tradition? e.g., Christianity, Judaism, Islam, etc.

No  Yes \_\_\_\_\_ If Christian, denomination \_\_\_\_\_

How important are these beliefs to you at this point in your life?

Unimportant  Somewhat unimportant  neither important nor unimportant  Somewhat important  Important

Appendix 2

Do you know if the person you are caring for has an advance directive (living will or power of attorney for health care decisions)?

No     Don't know     Yes: advance directive \_\_\_\_; power of attorney \_\_\_\_

Do you know where the person you are caring would prefer to die (for example: at home, in hospital, elsewhere) if he/she had a choice?

No     Don't know     Yes: at home \_\_\_\_ in hospital \_\_\_\_ elsewhere (please specify)

\_\_\_\_\_

**For coordinator/interviewer:**

Qualitative Interview completed: No \_\_\_\_\_ Yes \_\_\_\_\_ date: \_\_\_\_\_

Questionnaires completed:

QoL.....

HADS.....

CRA.....

*Instruction to Site Research Coordinator/ Interviewer: Sign and date this form*

Name of Site Research Coordinator: \_\_\_\_\_

Signature: \_\_\_\_\_ Date Completed: \_\_\_\_\_  
Year                      Month                      Day



Appendix 2

STATUS AND DEMOGRAPHICS Form

Study CID Number: \_\_\_ -- \_\_\_

Post-Opioid Experience Study (post-bereavement) ..... Site # Sequence#

*Definition of CAREGIVER* in this study: anyone (related or not) who provided care for someone who was seriously ill and was not paid to do so.

*What we mean by having provided CARE:* anything done for the person because he or she had a serious illness. *Some examples are:* household chores you took over; household chores that took more time (for example, extra laundry or preparing special foods); outside chores (yard work, snow removal, running errands, shopping) that you took over or took more time; banking and paperwork that you took over, or took more time; direct care provided for the care recipient (bathing, feeding, skin care, giving medications, wound care, toileting, transferring between bed and chair; additional time you spent with the care recipient, including keeping him or her company and being present for safety reasons; arranging appointments, arranging for help from paid or unpaid others; attending health care appointments; transportation; time spent in the hospital. *Please note that this is just a partial list.*

|                                                                                                                                                                                              |
|----------------------------------------------------------------------------------------------------------------------------------------------------------------------------------------------|
| Caregiver Initials: _____ -- _____ -- _____<br><div style="display: flex; justify-content: space-around; font-size: small;"> <span>First</span> <span>Middle</span> <span>Last</span> </div> |
| Date of Birth: _____ -- _____ -- _____<br><div style="display: flex; justify-content: space-around; font-size: small;"> <span>Year</span> <span>Month</span> <span>Day</span> </div>         |
| Gender (circle one):    F    or    M                                                                                                                                                         |

|                                                                                                               |                                                             |
|---------------------------------------------------------------------------------------------------------------|-------------------------------------------------------------|
| Were there other family members, friends, or neighbours involved in unpaid caregiving for the care recipient? | Yes <input type="checkbox"/><br>No <input type="checkbox"/> |
| Did you feel that you had the respite/relief that you needed?                                                 | Yes <input type="checkbox"/><br>No <input type="checkbox"/> |

|   | Relationship to care recipient. You were caring for your ... | (√)<br>one |
|---|--------------------------------------------------------------|------------|
| 1 | Husband/ wife/ partner                                       |            |
| 2 | Parent                                                       |            |
| 3 | Parent-in-law                                                |            |
| 4 | Daughter/ son                                                |            |
| 5 | Sister/ brother                                              |            |
| 6 | Other (specify):                                             |            |

|                                                                                                     |    |                                               |
|-----------------------------------------------------------------------------------------------------|----|-----------------------------------------------|
| Did you live with the care recipient?                                                               |    |                                               |
| <input type="checkbox"/> No                                                                         | or | <input type="checkbox"/> Yes – complete below |
| If Yes:<br>For <i>how long</i> did you live with the care recipient?<br>_____ months or _____ years |    |                                               |

|                                                                                                           |
|-----------------------------------------------------------------------------------------------------------|
| For <i>how long</i> were you a caregiver for the care recipient?<br><br>_____ months<br>or<br>_____ years |
|-----------------------------------------------------------------------------------------------------------|

*Please continue on page 2 ----->*

Appendix 2

| Ethnic/ Racial Group – self assessed |                               | (√)<br>one |
|--------------------------------------|-------------------------------|------------|
| 1                                    | Asian/ Pacific Islander       |            |
| 2                                    | African/ Black North American |            |
| 3                                    | Caucasian                     |            |
| 4                                    | East Indian                   |            |
| 5                                    | Native Canadian               |            |
| 6                                    | Other (specify):              |            |

| Education -- highest level achieved |                                               | (√)<br>one |
|-------------------------------------|-----------------------------------------------|------------|
| 1                                   | Elementary school or less                     |            |
| 2                                   | Some high school                              |            |
| 3                                   | High school graduate                          |            |
| 4                                   | Some college (including CEGEP)/ trade school  |            |
| 5                                   | College diploma (including DEC)/ trade school |            |
| 6                                   | Attended university                           |            |
| 7                                   | University degree                             |            |
| 8                                   | Post graduate degree                          |            |
| 9                                   | Other (specify):                              |            |

|                                                                           |                    |                                                                                                                                                      |                                                   |
|---------------------------------------------------------------------------|--------------------|------------------------------------------------------------------------------------------------------------------------------------------------------|---------------------------------------------------|
| Employment Status                                                         |                    | Did your employment status change as a result of your caregiving role? <input type="checkbox"/> No or <input type="checkbox"/> Yes – complete below: |                                                   |
| Current Employment Status                                                 |                    | (√)<br>one                                                                                                                                           | If YES: What was your previous employment status? |
| 1                                                                         | Employed full time |                                                                                                                                                      | 1 Employed full time                              |
| 2                                                                         | Employed part time |                                                                                                                                                      | 2 Employed part time                              |
| 3                                                                         | On paid leave      |                                                                                                                                                      | 3 On paid leave                                   |
| 4                                                                         | On unpaid leave    |                                                                                                                                                      | 4 On unpaid leave                                 |
| 5                                                                         | Self-employed      |                                                                                                                                                      | 5 Self-employed                                   |
| 6                                                                         | Retired            |                                                                                                                                                      | 6 Retired                                         |
| 7                                                                         | Not employed       |                                                                                                                                                      | 7 Not employed                                    |
| 8                                                                         | Other (specify):   |                                                                                                                                                      | 8 Other (specify):                                |
| Did your employer (if applicable) allow you to take time to provide care? |                    | (√)<br>one                                                                                                                                           |                                                   |
| 1                                                                         | Yes, completely    |                                                                                                                                                      |                                                   |
| 2                                                                         | Yes, partially     |                                                                                                                                                      |                                                   |
| 3                                                                         | No, not at all     |                                                                                                                                                      |                                                   |
| Comments:                                                                 |                    |                                                                                                                                                      |                                                   |

**For coordinator/interviewer:**

Qualitative Interview completed: No \_\_\_\_\_ Yes \_\_\_\_\_ date: \_\_\_\_\_

*Instruction to Site Research Coordinator/ Interviewer: Sign and date this form*

Name of Site Research Coordinator: \_\_\_\_\_

Signature: \_\_\_\_\_ Date Completed: \_\_\_\_\_  
Year Month Day
